# Supplementary material for: Functionalization of amine-cured epoxy resins by boronic acids based on dynamic dioxazaborocane formation
Source: Royal Society of Chemistry journal article supplement (doi:10.1039/d0py00048e), 2020-01-01
Supplement: d0py00048e1.pdf [file d0py00048e1.pdf]

Electronic Supplementary Information

## **Functionalization of amine-cured epoxy resins by boronic acids based on dynamic dioxazaborocane formation**

Yumiko Ito, Daisuke Aoki, and Hideyuki Otsuka\*

Department of Chemical Science and Engineering, Tokyo Institute of Technology,

2-12-1 Ookayama, Meguro-ku, Tokyo 152-8550, Japan

\*Corresponding author: Hideyuki Otsuka (Email: [otsuka@polymer.titech.ac.jp](mailto:otsuka@polymer.titech.ac.jp))

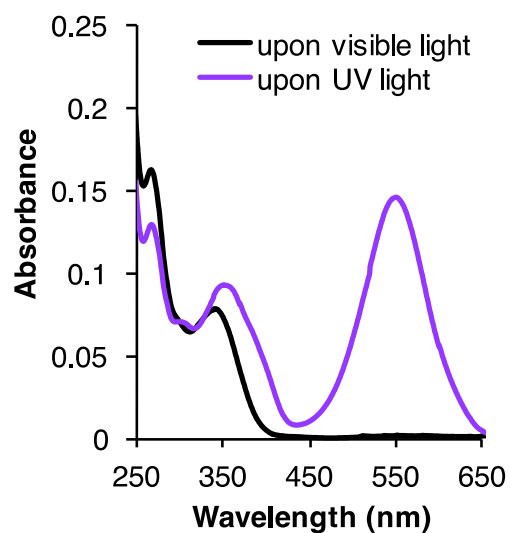

**Fig. S1.** UV-vis spectra of **SpBA** before (black) and after (purple) UV irradiation (254 nm, 2 min). Spectra were recorded on a 12.0  $\mu\text{M}$  solution in acetonitrile.

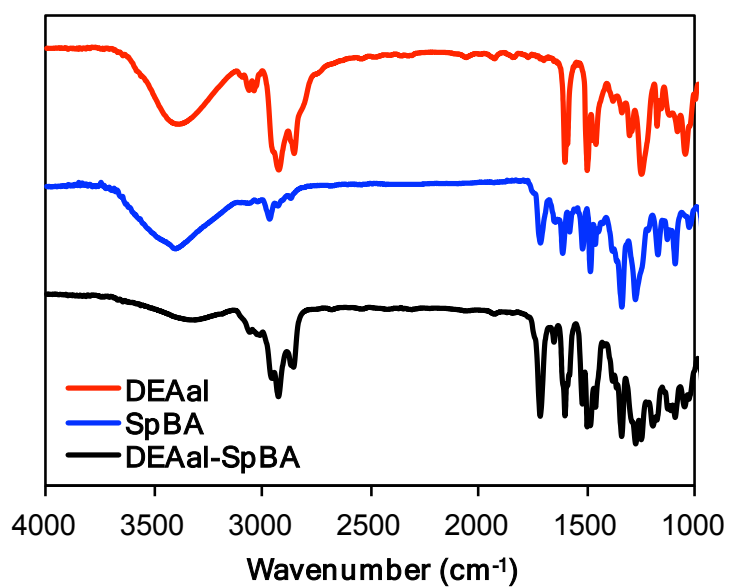

**Fig. S2.** FT-IR spectra of **DEAAI** (red), **SpBA** (blue) and **DEAAI-SpBA** (black) (NaCl).

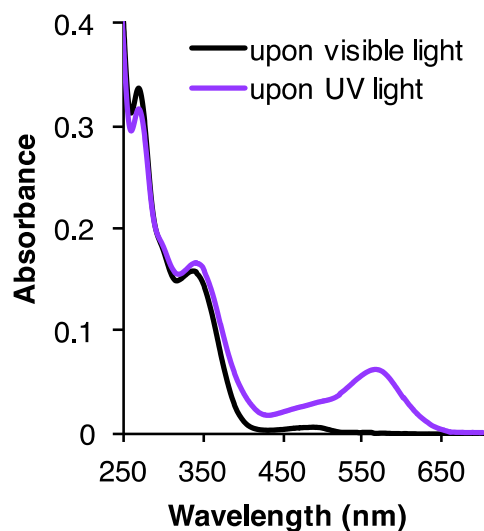

**Fig. S3.** UV-vis spectra of PSpBA before (black) and after (purple) UV irradiation (254 nm, 20 min). Spectra were recorded on an 8.00 mM solution in acetonitrile.

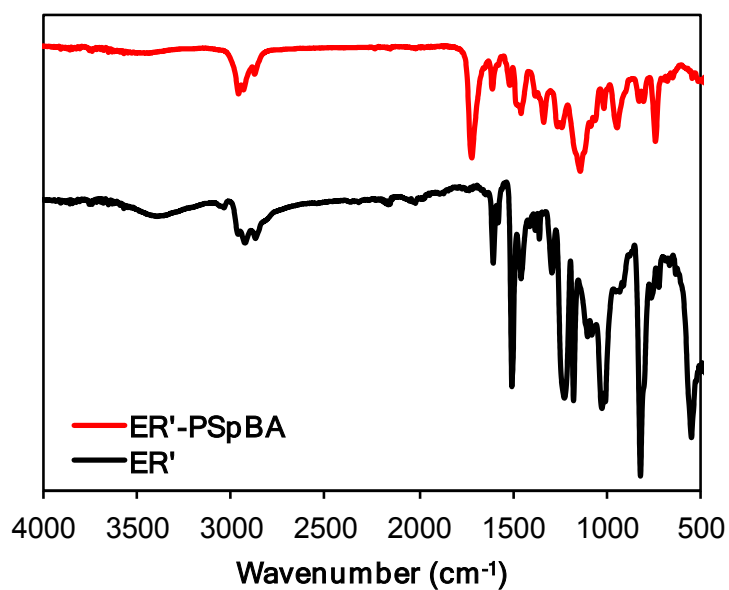

**Fig. S4.** ATR-FTIR spectra of ER' (black) and ER' coated with PSpBA (blue).

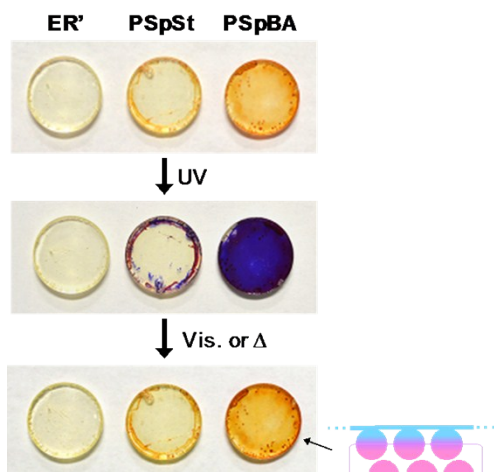

**Fig. S5.** Reversible color change of PSpBA coating

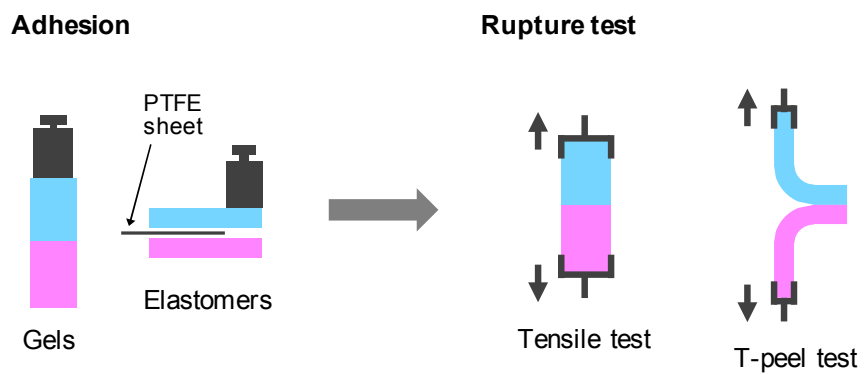

**Fig. S6.** Procedure for the evaluation of adhesion strength.

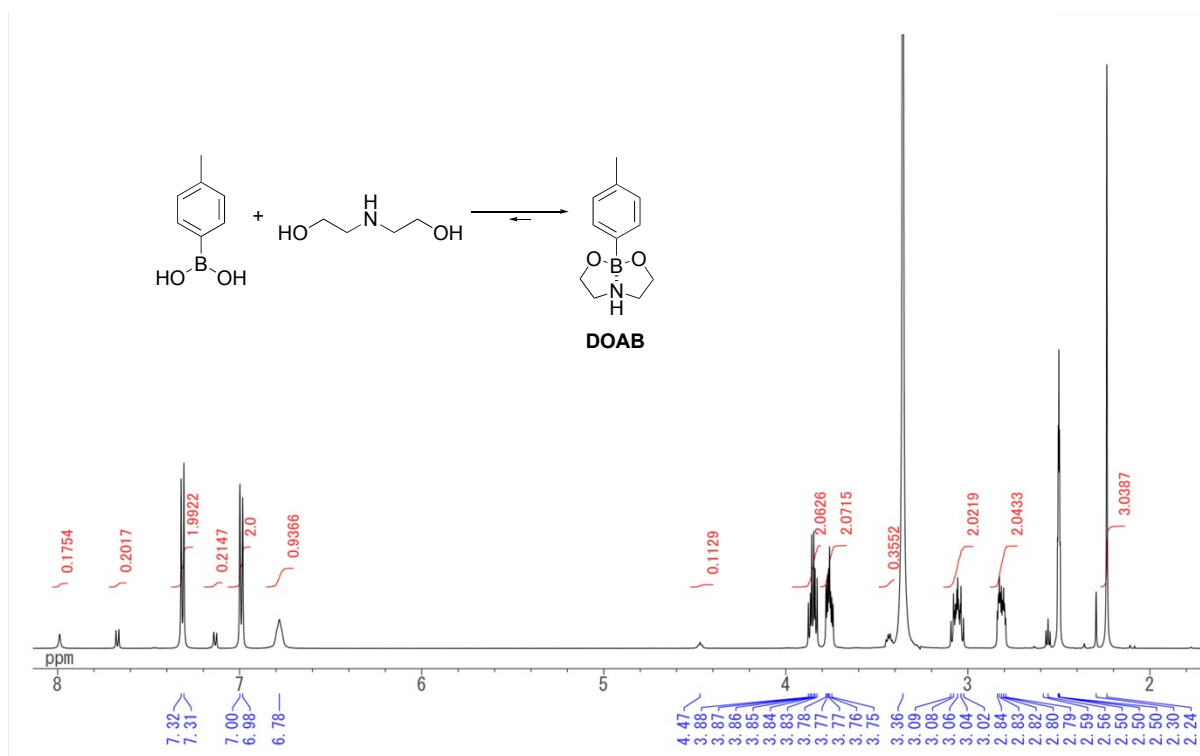

**Fig. S7.**  $^1\text{H}$  NMR spectrum of the mixture of 4-methylphenylboronic acid and diethanolamine (DMSO- $d_6$ , 500 MHz).

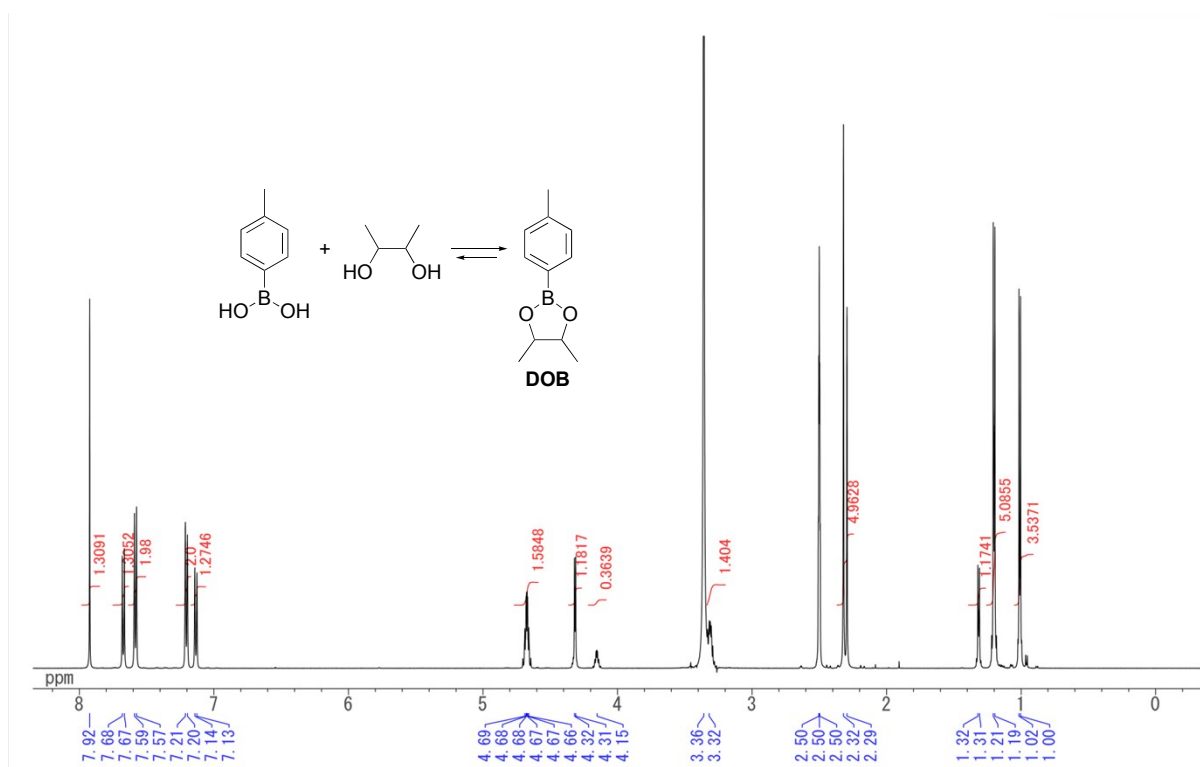

**Fig. S8.**  $^1\text{H}$  NMR spectrum of the mixture of 4-methylphenylboronic acid and 2,3-butane diol (DMSO- $d_6$ , 500 MHz).

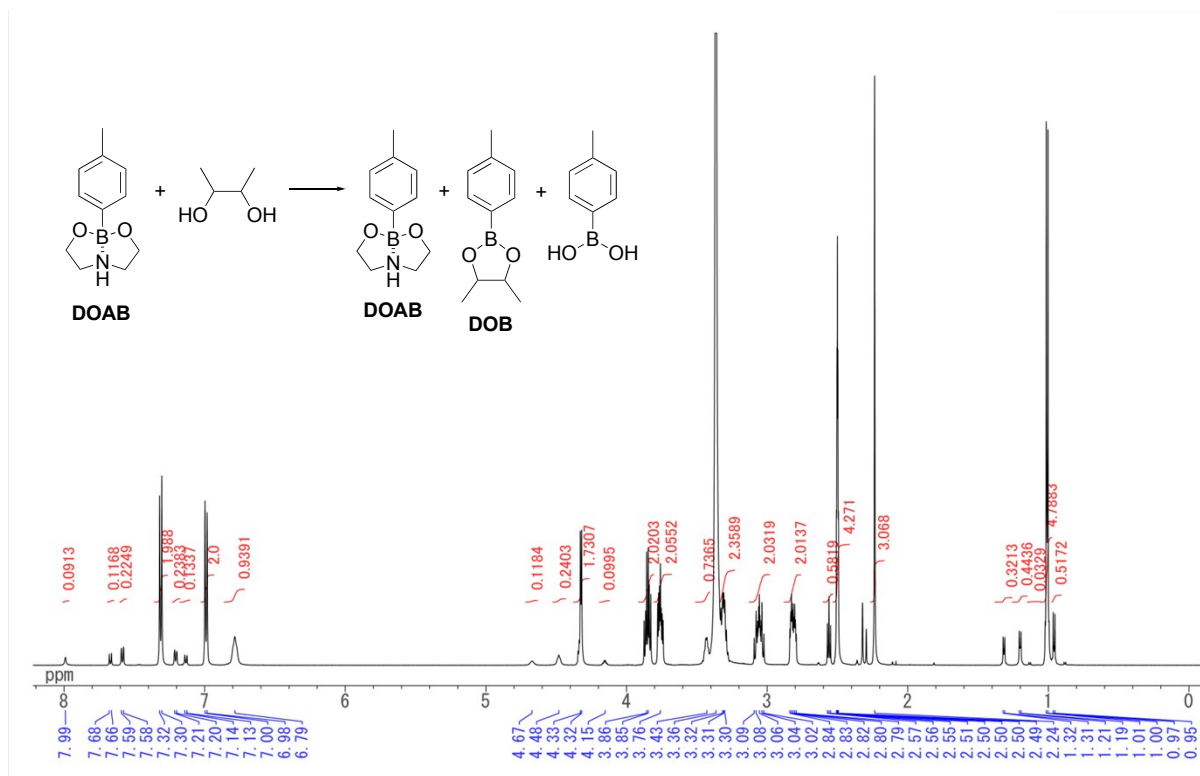

**Fig. S9.** <sup>1</sup>H NMR spectrum of the mixture of DOAB and 2,3-butanediol after their transesterification reached the equilibrium (DMSO-*d*<sub>6</sub>, 500 MHz).

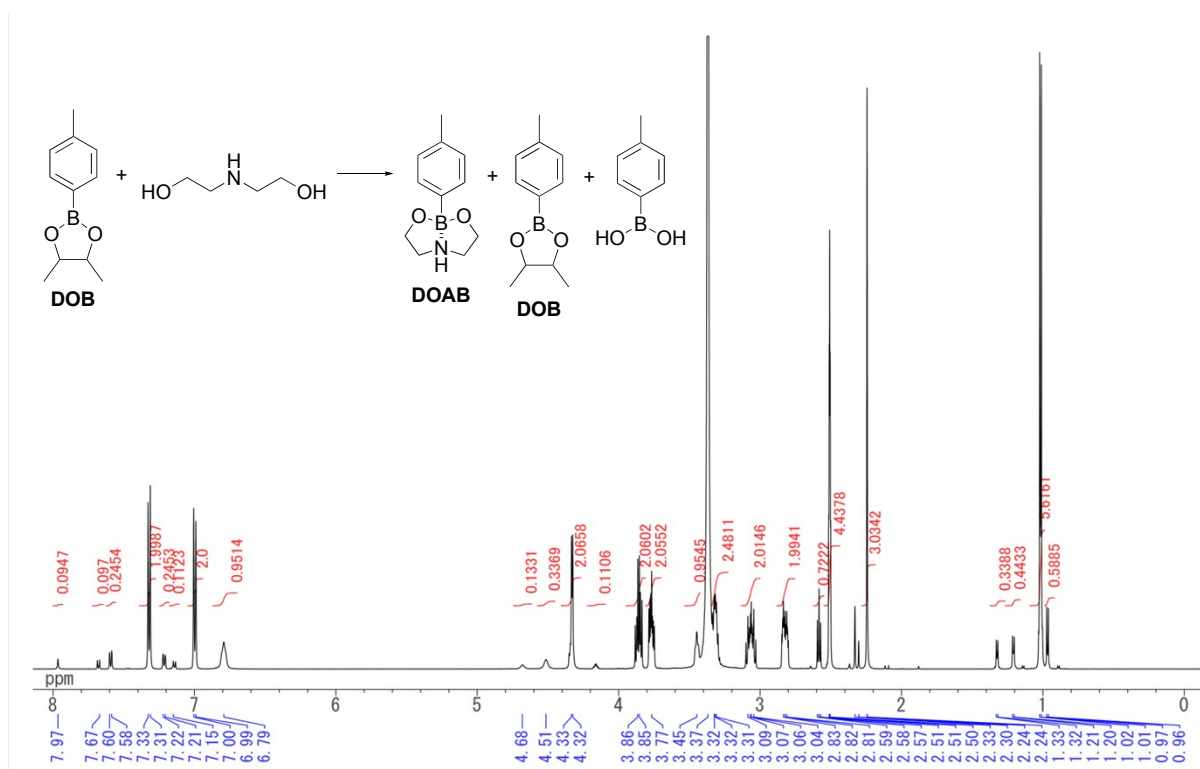

**Fig. S10.** <sup>1</sup>H NMR spectrum of the mixture of DOB and diethanolamine after their transesterification reached the equilibrium (DMSO-*d*<sub>6</sub>, 500 MHz).
